# Supplementary material for: Klebsiella aerogenes Adhesion Behaviour during Biofilm Formation on Monazite
Source: MDPI journal article supplement (doi:10.3390/microorganisms11051331), 2023-05-18
Supplement: s1 [file s1]

# Supplementary Material

## *Klebsiella aerogenes* Adhesion Behaviour during Biofilm Formation on Monazite

Arya Van Alin <sup>1,2</sup>, Melissa K. Corbett <sup>1,2</sup>, Homayoun Fathollahzadeh <sup>1,2</sup>, M. Christian Tjiam <sup>1,3,4</sup>, Andrew Putnis <sup>2,5</sup>, Jacques Eksteen <sup>6</sup>, Anna H. Kaksonen <sup>6,7</sup> and Elizabeth Watkin <sup>1,2,8,\*</sup>

- <sup>1</sup> Curtin Medical School, Curtin University, Bentley, WA 6102, Australia;  
a.vanalin@postgrad.curtin.edu.au (A.V.A.);  
homayoun.fathollahzadeh@curtin.edu.au (H.F.); christian.tjiam@uwa.edu.au (M.C.T.)
- <sup>2</sup> The Institute for Geoscience Research, School of Earth and Planetary Sciences, Curtin University, Bentley, WA 6102, Australia
- <sup>3</sup> Wesfarmers Centre of Vaccines and Infectious Diseases, Telethon Kids Institute, Nedlands, WA 6009, Australia
- <sup>4</sup> Centre for Child Health Research, The University of Western Australia, Nedlands, WA 6009, Australia
- <sup>5</sup> Institut für Mineralogie, University of Münster, 48149 Münster, Germany
- <sup>6</sup> WA School of Mines, Minerals, Energy and Chemical Engineering, Curtin University, Waterford, WA 6152, Australia; jacques.eksteen@curtin.edu.au (J.E.);  
anna.kaksonen@csiro.au (A.H.K.)
- <sup>7</sup> CSIRO Environment, Floreat, WA 6014, Australia
- <sup>8</sup> School of Science, Edith Cowan University, Joondalup, WA 6027, Australia
- \* Correspondence: e.watkin@ecu.edu.au

**Table S1.** The XRD and phase identification of the high-grade monazite ore conducted by John de Laeter Centre, Curtin University. The COD ID refers to the phase's identification number in the COD database (<http://www.crystallography.net/>).

| Phase         | Nominal elemental composition                                                     |
|---------------|-----------------------------------------------------------------------------------|
| Monazite, Ce  | CePO <sub>4</sub>                                                                 |
| Monazite, La  | LaPO <sub>4</sub>                                                                 |
| Quartz        | SiO <sub>2</sub>                                                                  |
| Goethite      | FeOOH                                                                             |
| Florencite-Ce | Al <sub>3</sub> (Ce,La,Nd,Sm,Ca)(PO <sub>4</sub> ) <sub>2</sub> (OH) <sub>6</sub> |

**Table S2.** The inductively coupled plasma mass spectrometry (ICP-MS) analysis of high-grade monazite ore conducted by Bureau Veritas, Perth, Australia.

| Elements (%) |       |
|--------------|-------|
| Al           | 3.9   |
| Ca           | 1.8   |
| Fe           | 1     |
| K            | <0.01 |
| Mg           | 0.1   |
| Mn           | 0.06  |
| Na           | 0.1   |
| P            | 8.5   |
| Si           | 1.6   |
| Ti           | 0.4   |
| Y            | 0.18  |
| La           | 11    |
| Ce           | 15    |
| Pr           | 2.1   |
| Nd           | 7.2   |
| Sm           | 0.97  |
| S            | 0     |

**Table S3.** The XRF (X-ray fluorescence) and ICP-MS composition of xenotime beneficiation concentrate (reported by the provider, Northern Minerals).

| Compound                       | XRF analysis (Mass %) | ICPMS analysis |
|--------------------------------|-----------------------|----------------|
| SiO <sub>2</sub>               | 52.5                  | Not measured   |
| Al <sub>2</sub> O <sub>3</sub> | 6.1                   | 7.82           |
| Y <sub>2</sub> O <sub>3</sub>  | 8.6                   | 5.23           |
| Dy <sub>2</sub> O <sub>3</sub> | 1                     | 1.03           |
| Er <sub>2</sub> O <sub>3</sub> | 0.7                   | 0.63           |
| Yb <sub>2</sub> O <sub>3</sub> | 0.5                   | 0.53           |
| Gd <sub>2</sub> O <sub>3</sub> | 0.4                   | 0.47           |
| Sm <sub>2</sub> O <sub>3</sub> | 0.2                   | 0.21           |
| Fe <sub>2</sub> O <sub>3</sub> | 9.1                   | 11.94          |
| CaO                            | 0.255                 | 1.38           |

|                                   |              |       |
|-----------------------------------|--------------|-------|
| <b>U<sub>3</sub>O<sub>8</sub></b> | 0.055        | 0.05  |
| <b>P<sub>2</sub>O<sub>3</sub></b> | Not measured | 12.77 |

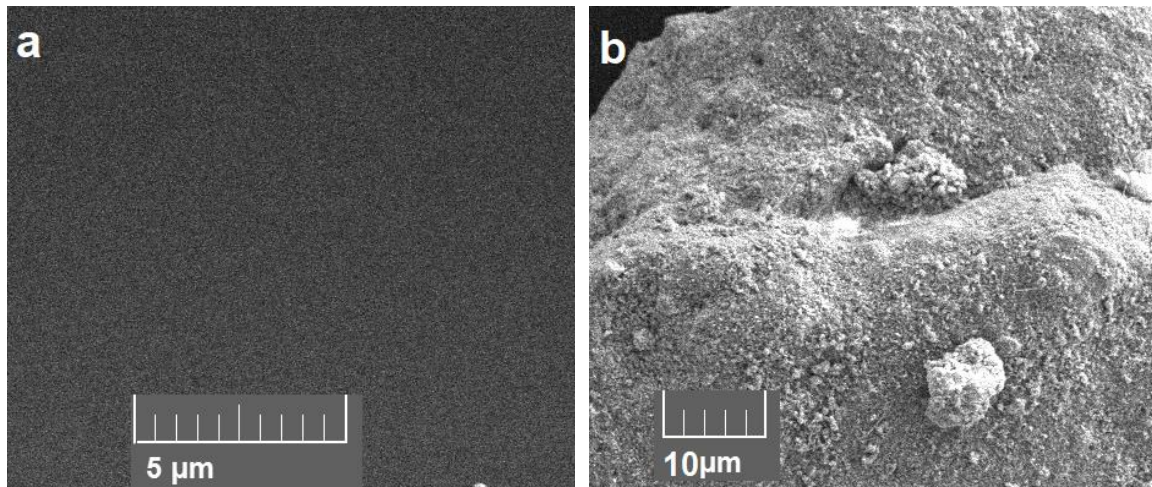

**Figure S1.** Scanning electron microscopy (SEM) image of the smooth surface of glass (**a**) vs. the rough surface of the high-grade monazite ore (**b**).

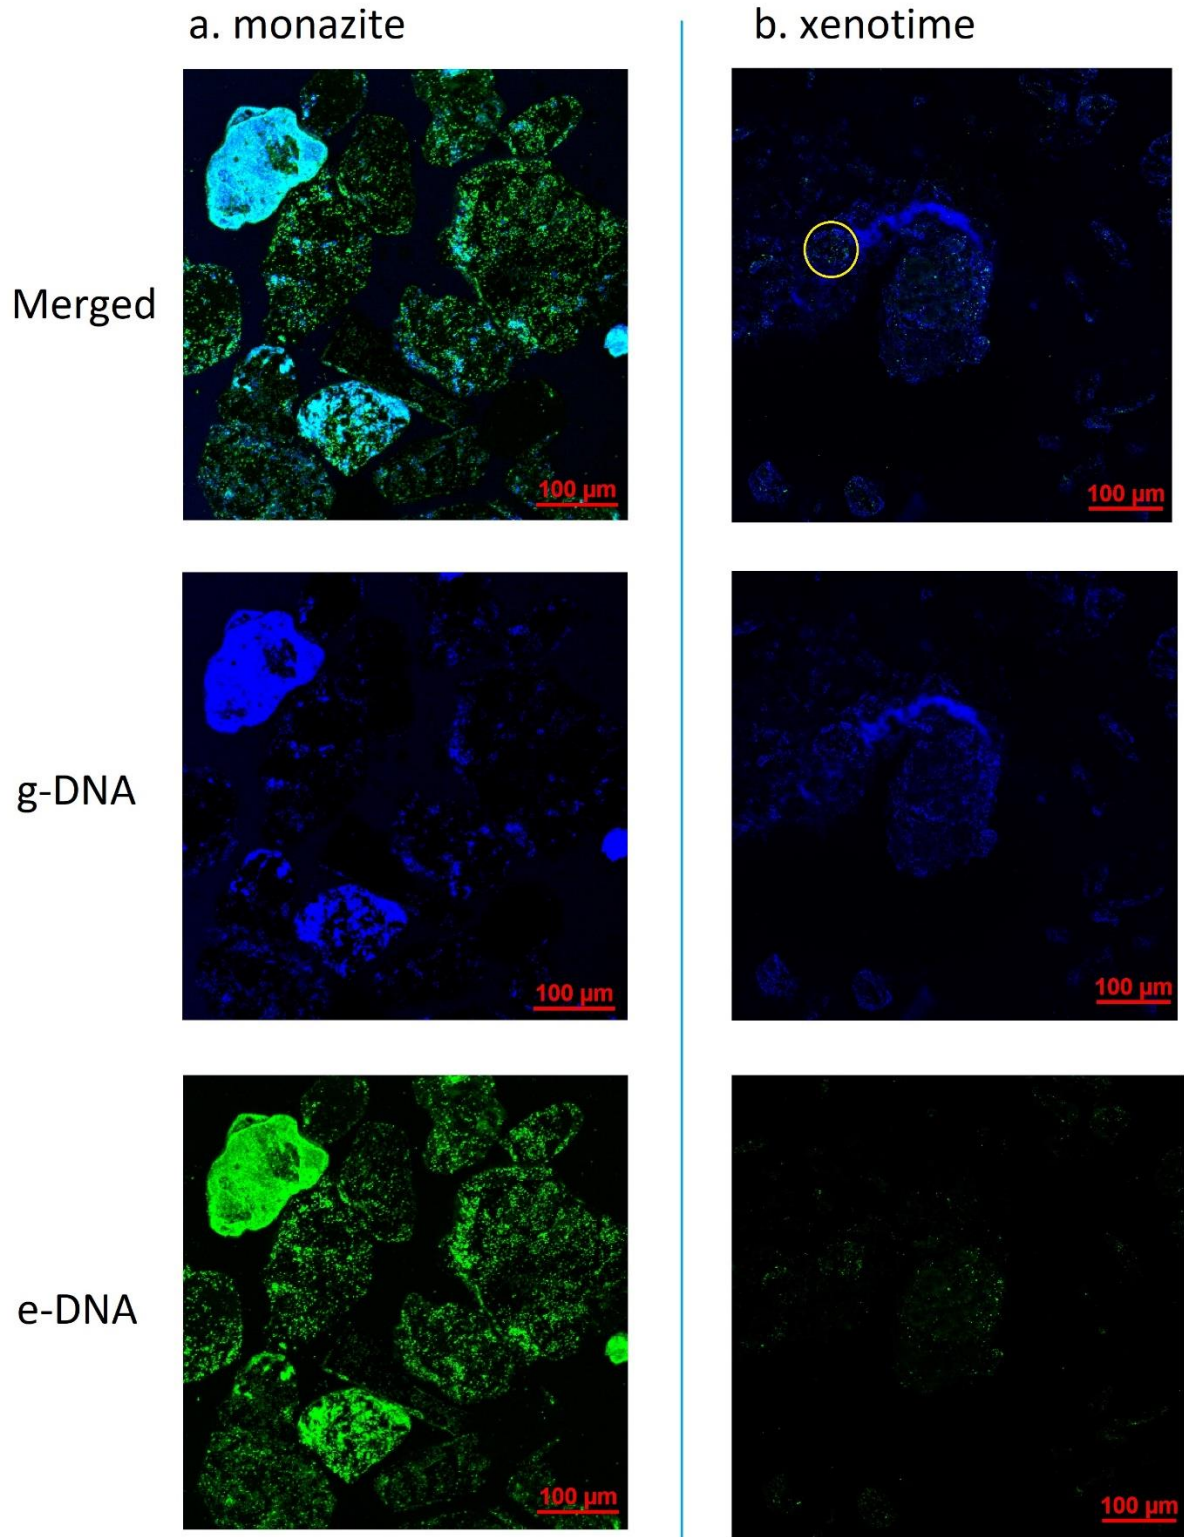

**Figure S2.** The general pattern of eDNA production on monazite (a) and xenotime (b) based on confocal laser scanning microscopy (CLSM). The green fluorescent represents eDNA (eDNA) and blue represent genomic DNA (gDNA). More eDNA was produced using monazite. Yellow circle marks the xenotime grain used for 3D re-construction in Figure 5.

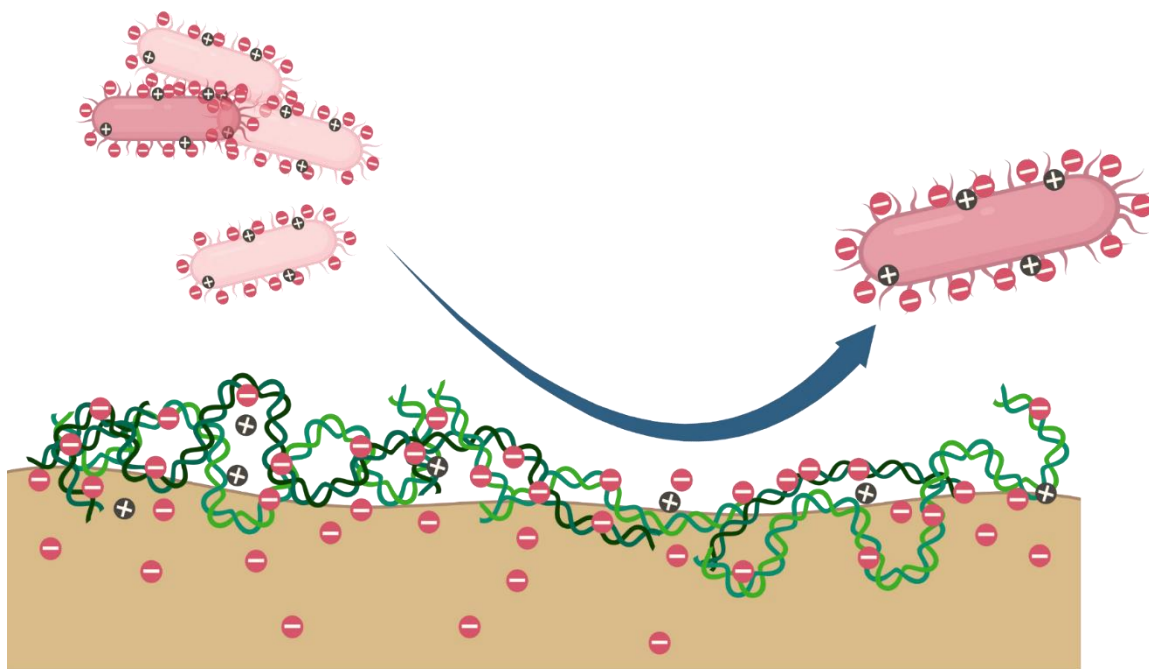

**Figure S3.** The interaction of *Klebsiella aerogenes* cells with surface pre-conditioned with eDNA.

## Statistical data

### Raw stats - 1

| X              | A                    |       |   | B            |        |   | D                       |       |   |
|----------------|----------------------|-------|---|--------------|--------|---|-------------------------|-------|---|
| Time (minutes) | Ctrl 1( P deficient) |       |   | Ctrl 2 (+P ) |        |   | 10 <sup>7</sup> cell/mL |       |   |
| X              | Mean                 | SD    | N | Mean         | SD     | N | Mean                    | SD    | N |
| 0.000          | 100.000              | 0.000 | 3 | 100.000      | 0.000  | 3 | 100.000                 | 0.000 | 3 |
| 1.000          | 89.600               | 0.800 | 3 | 89.867       | 1.665  | 3 | 92.267                  | 4.406 | 3 |
| 10.000         | 80.800               | 6.835 | 3 | 82.400       | 2.884  | 3 | 65.333                  | 3.781 | 3 |
| 30.000         | 47.467               | 3.781 | 3 | 49.333       | 2.444  | 3 | 40.000                  | 4.233 | 3 |
| 60.000         | 49.867               | 5.445 | 3 | 53.600       | 2.117  | 3 | 33.600                  | 2.117 | 3 |
| 120.000        | 58.667               | 3.607 | 3 | 59.467       | 7.259  | 3 | 38.400                  | 3.200 | 3 |
| 180.000        | 58.133               | 3.946 | 3 | 61.333       | 10.653 | 3 | 22.933                  | 3.331 | 3 |
| 240.000        | 59.200               | 2.884 | 3 | 53.867       | 2.444  | 3 | 26.133                  | 2.013 | 3 |

| Time (minutes) | 10 <sup>6</sup> cell/mL |       |   | 10 <sup>7</sup> cell/mL |       |   | 5 x 10 <sup>7</sup> cell/mL |        |   |
|----------------|-------------------------|-------|---|-------------------------|-------|---|-----------------------------|--------|---|
| X              | Mean                    | SD    | N | Mean                    | SD    | N | Mean                        | SD     | N |
| 0.000          | 100.000                 | 0.000 | 3 | 100.000                 | 0.000 | 3 | 100.000                     | 0.000  | 3 |
| 1.000          | 89.367                  | 6.369 | 3 | 92.267                  | 4.406 | 3 | 47.433                      | 7.826  | 3 |
| 10.000         | 59.667                  | 3.958 | 3 | 65.333                  | 3.781 | 3 | 57.033                      | 4.620  | 3 |
| 30.000         | 47.067                  | 1.405 | 3 | 40.000                  | 4.233 | 3 | 34.833                      | 5.138  | 3 |
| 60.000         | 45.067                  | 5.613 | 3 | 33.600                  | 2.117 | 3 | 68.900                      | 2.200  | 3 |
| 120.000        | 38.933                  | 2.219 | 3 | 38.400                  | 3.200 | 3 | 72.133                      | 4.735  | 3 |
| 180.000        | 38.033                  | 1.026 | 3 | 22.933                  | 3.331 | 3 | 76.233                      | 4.412  | 3 |
| 240.000        | 37.767                  | 2.294 | 3 | 26.133                  | 2.013 | 3 | 93.367                      | 11.582 | 3 |

### Comparison - 1

| Dunnett's multiple comparisons test                     | Summary | Adjusted P Value | Dunnett's multiple comparisons test                     | Summary | Adjusted P Value |
|---------------------------------------------------------|---------|------------------|---------------------------------------------------------|---------|------------------|
| Row 1                                                   |         |                  | Row 5                                                   |         |                  |
| 10 <sup>7</sup> cell/mL vs. Ctrl 1( P deficient)        |         |                  | 10 <sup>7</sup> cell/mL vs. Ctrl 1( P deficient)        | ns      | 0.0563           |
| 10 <sup>7</sup> cell/mL vs. Ctrl 2 (+P )                |         |                  | 10 <sup>7</sup> cell/mL vs. Ctrl 2 (+P )                | ***     | 0.0009           |
| 10 <sup>7</sup> cell/mL vs. 10 <sup>6</sup> cell/mL     |         |                  | 10 <sup>7</sup> cell/mL vs. 10 <sup>6</sup> cell/mL     | ns      | 0.1325           |
| 10 <sup>7</sup> cell/mL vs. 5 x 10 <sup>7</sup> cell/mL |         |                  | 10 <sup>7</sup> cell/mL vs. 5 x 10 <sup>7</sup> cell/mL | ***     | 0.0001           |
| Row 2                                                   |         |                  | Row 6                                                   |         |                  |
| 10 <sup>7</sup> cell/mL vs. Ctrl 1( P deficient)        | ns      | 0.7266           | 10 <sup>7</sup> cell/mL vs. Ctrl 1( P deficient)        | **      | 0.0056           |
| 10 <sup>7</sup> cell/mL vs. Ctrl 2 (+P )                | ns      | 0.7963           | 10 <sup>7</sup> cell/mL vs. Ctrl 2 (+P )                | ns      | 0.0566           |
| 10 <sup>7</sup> cell/mL vs. 10 <sup>6</sup> cell/mL     | ns      | 0.9055           | 10 <sup>7</sup> cell/mL vs. 10 <sup>6</sup> cell/mL     | ns      | 0.9968           |
| 10 <sup>7</sup> cell/mL vs. 5 x 10 <sup>7</sup> cell/mL | **      | 0.0070           | 10 <sup>7</sup> cell/mL vs. 5 x 10 <sup>7</sup> cell/mL | **      | 0.0026           |
| Row 3                                                   |         |                  | Row 7                                                   |         |                  |
| 10 <sup>7</sup> cell/mL vs. Ctrl 1( P deficient)        | ns      | 0.0969           | 10 <sup>7</sup> cell/mL vs. Ctrl 1( P deficient)        | ***     | 0.0010           |
| 10 <sup>7</sup> cell/mL vs. Ctrl 2 (+P )                | *       | 0.0116           | 10 <sup>7</sup> cell/mL vs. Ctrl 2 (+P )                | *       | 0.0409           |
| 10 <sup>7</sup> cell/mL vs. 10 <sup>6</sup> cell/mL     | ns      | 0.3483           | 10 <sup>7</sup> cell/mL vs. 10 <sup>6</sup> cell/mL     | *       | 0.0245           |
| 10 <sup>7</sup> cell/mL vs. 5 x 10 <sup>7</sup> cell/mL | ns      | 0.1905           | 10 <sup>7</sup> cell/mL vs. 5 x 10 <sup>7</sup> cell/mL | ***     | 0.0004           |
| Row 4                                                   |         |                  | Row 8                                                   |         |                  |
| 10 <sup>7</sup> cell/mL vs. Ctrl 1( P deficient)        | ns      | 0.2134           | 10 <sup>7</sup> cell/mL vs. Ctrl 1( P deficient)        | ***     | 0.0005           |
| 10 <sup>7</sup> cell/mL vs. Ctrl 2 (+P )                | ns      | 0.1029           | 10 <sup>7</sup> cell/mL vs. Ctrl 2 (+P )                | ***     | 0.0004           |
| 10 <sup>7</sup> cell/mL vs. 10 <sup>6</sup> cell/mL     | ns      | 0.2011           | 10 <sup>7</sup> cell/mL vs. 10 <sup>6</sup> cell/mL     | **      | 0.0080           |
| 10 <sup>7</sup> cell/mL vs. 5 x 10 <sup>7</sup> cell/mL | ns      | 0.5443           | 10 <sup>7</sup> cell/mL vs. 5 x 10 <sup>7</sup> cell/mL | *       | 0.0186           |

## Raw stats - 2

| Time (minutes) | 0.5% Slurry |        |   | 1% slurry  |       |   | 2% Slurry |       |   |
|----------------|-------------|--------|---|------------|-------|---|-----------|-------|---|
| X              | Mean        | SD     | N | Mean       | SD    | N | Mean      | SD    | N |
| 0.000          | 100.000     | 0.000  | 3 | 100.000    | 0.000 | 3 | 100.000   | 0.000 | 3 |
| 1.000          | 86.000      | 10.113 | 3 | 92.267     | 4.406 | 3 | 55.567    | 2.550 | 3 |
| 10.000         | 91.333      | 5.605  | 3 | 65.333     | 3.781 | 3 | 27.800    | 1.825 | 3 |
| 30.000         | 63.200      | 8.551  | 3 | 40.000     | 4.233 | 3 | 24.600    | 0.721 | 3 |
| 60.000         | 59.133      | 11.002 | 3 | 33.600     | 2.117 | 3 | 17.500    | 1.967 | 3 |
| 120.000        | 48.200      | 10.371 | 3 | 38.400     | 3.200 | 3 | 13.000    | 0.458 | 3 |
| 180.000        | 60.067      | 11.705 | 3 | 22.933     | 3.331 | 3 | 13.833    | 2.023 | 3 |
| 240.000        | 61.933      | 9.646  | 3 | 26.133     | 2.013 | 3 | 12.800    | 1.833 | 3 |
|                |             |        |   |            |       |   |           |       |   |
| Time (minutes) | 5% Slurry   |        |   | 10% Slurry |       |   |           |       |   |
| X              | Mean        | SD     | N | Mean       | SD    | N |           |       |   |
|                | 100.000     | 0.000  | 3 | 100.000    | 0.000 | 3 |           |       |   |
|                | 38.267      | 2.811  | 3 | 30.300     | 6.678 | 3 |           |       |   |
|                | 20.500      | 0.458  | 3 | 12.200     | 0.361 | 3 |           |       |   |
|                | 13.433      | 2.695  | 3 | 8.767      | 0.416 | 3 |           |       |   |
|                | 10.600      | 2.623  | 3 | 8.267      | 0.577 | 3 |           |       |   |
|                | 8.867       | 1.401  | 3 | 9.100      | 0.300 | 3 |           |       |   |
|                | 11.967      | 2.250  | 3 | 9.067      | 0.839 | 3 |           |       |   |
|                | 11.633      | 1.710  | 3 | 8.733      | 0.702 | 3 |           |       |   |

## Comparison - 2



| Dunnett's multiple comparisons test | Below threshold? | Summary | Adjusted P Value |
|-------------------------------------|------------------|---------|------------------|
| Row 1                               |                  |         |                  |
| 1% slurry vs. Ctrl 1( P deficient)  |                  |         |                  |
| 1% slurry vs. Ctrl 2 (+P )          |                  |         |                  |
| 1% slurry vs. 0.5% Slurry           |                  |         |                  |
| 1% slurry vs. 2% Slurry             |                  |         |                  |
| 1% slurry vs. 5% Slurry             |                  |         |                  |
| 1% slurry vs. 10% Slurry            |                  |         |                  |
| Row 2                               |                  |         |                  |
| 1% slurry vs. Ctrl 1( P deficient)  | No               | ns      | 0.7980           |
| 1% slurry vs. Ctrl 2 (+P )          | No               | ns      | 0.8646           |
| 1% slurry vs. 0.5% Slurry           | No               | ns      | 0.8194           |
| 1% slurry vs. 2% Slurry             | Yes              | **      | 0.0026           |
| 1% slurry vs. 5% Slurry             | Yes              | ***     | 0.0006           |
| 1% slurry vs. 10% Slurry            | Yes              | **      | 0.0014           |
| Row 3                               |                  |         |                  |
| 1% slurry vs. Ctrl 1( P deficient)  | No               | ns      | 0.1192           |
| 1% slurry vs. Ctrl 2 (+P )          | Yes              | *       | 0.0147           |
| 1% slurry vs. 0.5% Slurry           | Yes              | *       | 0.0140           |
| 1% slurry vs. 2% Slurry             | Yes              | **      | 0.0023           |
| 1% slurry vs. 5% Slurry             | Yes              | **      | 0.0056           |
| 1% slurry vs. 10% Slurry            | Yes              | **      | 0.0041           |
| Row 4                               |                  |         |                  |
| 1% slurry vs. Ctrl 1( P deficient)  | No               | ns      | 0.2619           |
| 1% slurry vs. Ctrl 2 (+P )          | No               | ns      | 0.1267           |
| 1% slurry vs. 0.5% Slurry           | No               | ns      | 0.0779           |
| 1% slurry vs. 2% Slurry             | No               | ns      | 0.0581           |
| 1% slurry vs. 5% Slurry             | Yes              | **      | 0.0056           |
| 1% slurry vs. 10% Slurry            | Yes              | *       | 0.0151           |
| Row 5                               |                  |         |                  |
| 1% slurry vs. Ctrl 1( P deficient)  | No               | ns      | 0.0685           |
| 1% slurry vs. Ctrl 2 (+P )          | Yes              | **      | 0.0012           |
| 1% slurry vs. 0.5% Slurry           | No               | ns      | 0.1372           |
| 1% slurry vs. 2% Slurry             | Yes              | **      | 0.0024           |
| 1% slurry vs. 5% Slurry             | Yes              | **      | 0.0013           |
| 1% slurry vs. 10% Slurry            | Yes              | **      | 0.0036           |
| Row 6                               |                  |         |                  |
| 1% slurry vs. Ctrl 1( P deficient)  | Yes              | **      | 0.0071           |
| 1% slurry vs. Ctrl 2 (+P )          | No               | ns      | 0.0693           |
| 1% slurry vs. 0.5% Slurry           | No               | ns      | 0.5578           |
| 1% slurry vs. 2% Slurry             | Yes              | *       | 0.0123           |
| 1% slurry vs. 5% Slurry             | Yes              | **      | 0.0034           |
| 1% slurry vs. 10% Slurry            | Yes              | **      | 0.0098           |
| Row 7                               |                  |         |                  |
| 1% slurry vs. Ctrl 1( P deficient)  | Yes              | **      | 0.0012           |
| 1% slurry vs. Ctrl 2 (+P )          | Yes              | *       | 0.0495           |
| 1% slurry vs. 0.5% Slurry           | No               | ns      | 0.0679           |
| 1% slurry vs. 2% Slurry             | No               | ns      | 0.0721           |
| 1% slurry vs. 5% Slurry             | Yes              | *       | 0.0413           |
| 1% slurry vs. 10% Slurry            | Yes              | *       | 0.0396           |
| Row 8                               |                  |         |                  |
| 1% slurry vs. Ctrl 1( P deficient)  | Yes              | ***     | 0.0006           |
| 1% slurry vs. Ctrl 2 (+P )          | Yes              | ***     | 0.0005           |
| 1% slurry vs. 0.5% Slurry           | No               | ns      | 0.0535           |
| 1% slurry vs. 2% Slurry             | Yes              | **      | 0.0040           |
| 1% slurry vs. 5% Slurry             | Yes              | **      | 0.0028           |
| 1% slurry vs. 10% Slurry            | Yes              | **      | 0.0058           |
